# Supplementary material for: Proteomic Characterization of Plasma in Lemierre's Syndrome
Source: PubMed Central journal article supplement — Thromb Haemost. 2024 Feb 7;124(5):432–40. doi: 10.1055/a-2195-3927 (PMC11038868; doi:10.1055/a-2195-3927), 2024-02-07
Supplement: 10-1055-a-2195-3927-s23050181-2.pdf [file 10-1055-a-2195-3927-s23050181-2.pdf]

# Mass Spectrometry Lemierre - Supplementary plots

Gustav Torisson

## Descripton of raw data

- Raw data consists of a wide dataframe with 654 rows with protein names and 24 columns (1 with protein names and 23 samples).
- These were grouped into 8 with Lemierre syndrome (“LS”), 15 other sepsis (“Sepsis”).
- There was one measurement per sample.

## Initial data management

- Proteins with several names, separated with semicolon(;) were renamed to only the first name (left of semicolon)
- Datapoints labelled as “Filtered” were re-labelled as NA.
- Data was converted to “numeric” format, as it was “character” from the Excel import
- Datapoints labelled as Nan (Not a Number) were also labelled as NA

## Log2 transformation

- all measurements were log2 transformed

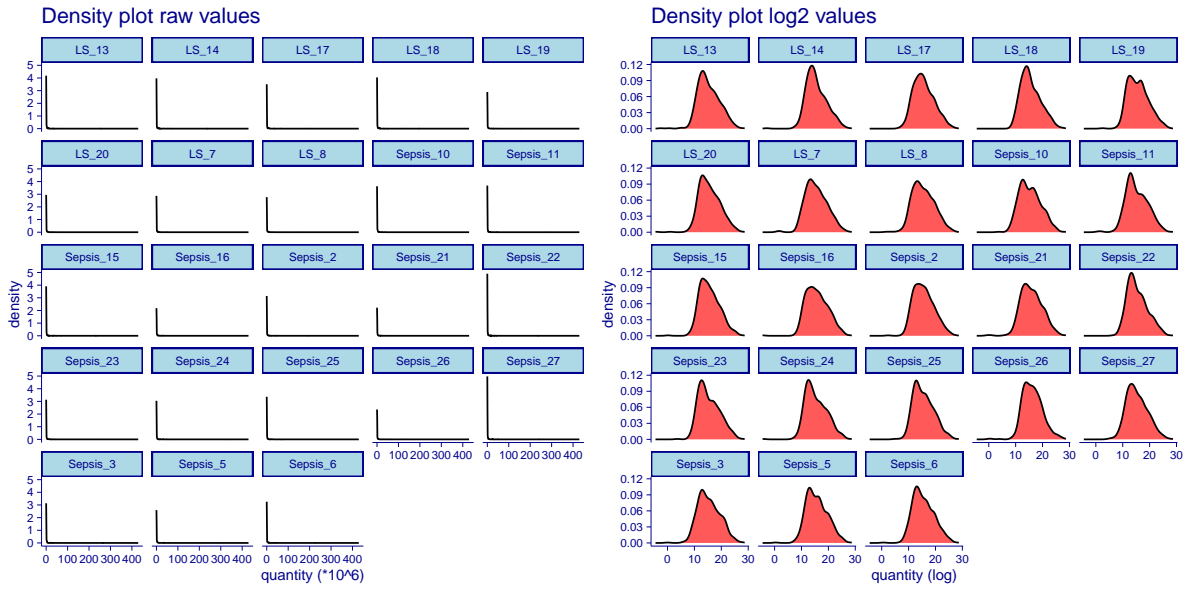

Figure 1: Density plots of raw and log2 transformed values

## Filtering

- Of 654 proteins, 341 (52.1%) had complete data, in all 23 samples
- 205 proteins (31.3%) were missing in  $\geq 7$  (30% of all) samples.
- These were filtered, leaving 449 proteins

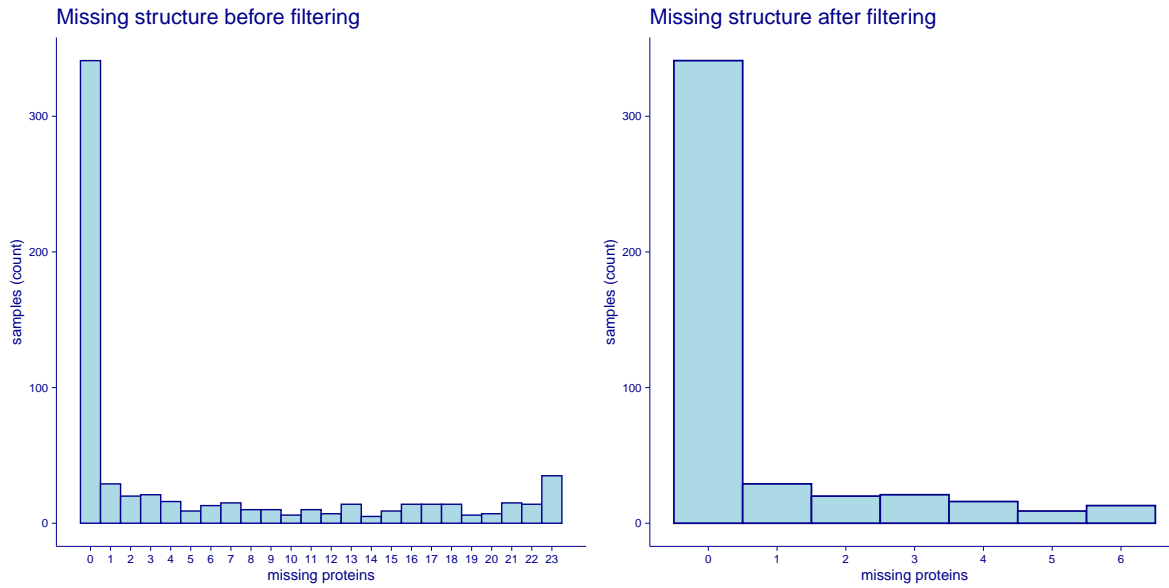

Figure 2: Missing structure before and after filtering

## Normalisation

- all values were normalised by sample by subtracting the sample median from the Log2 intensity values

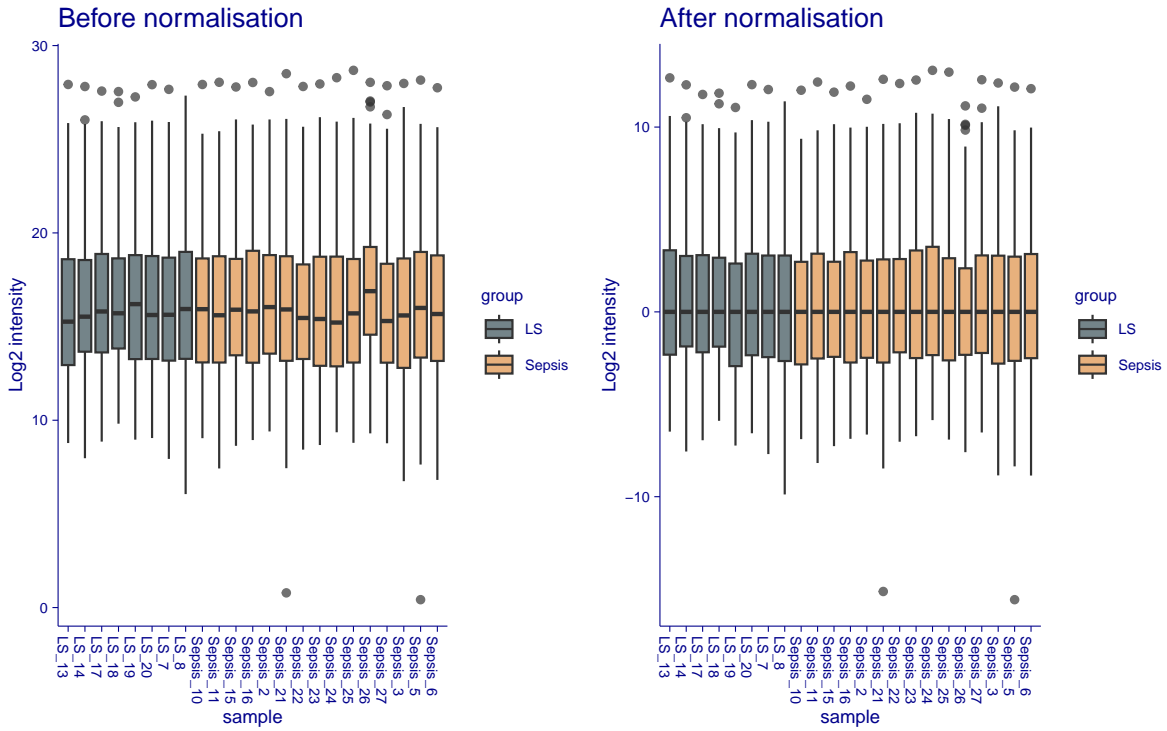

Figure 3: Before and after by-sample normalisation.

## Missing per sample and group

- All NAs were considered to represent low intensities and to represent MNAR (missing not at random)

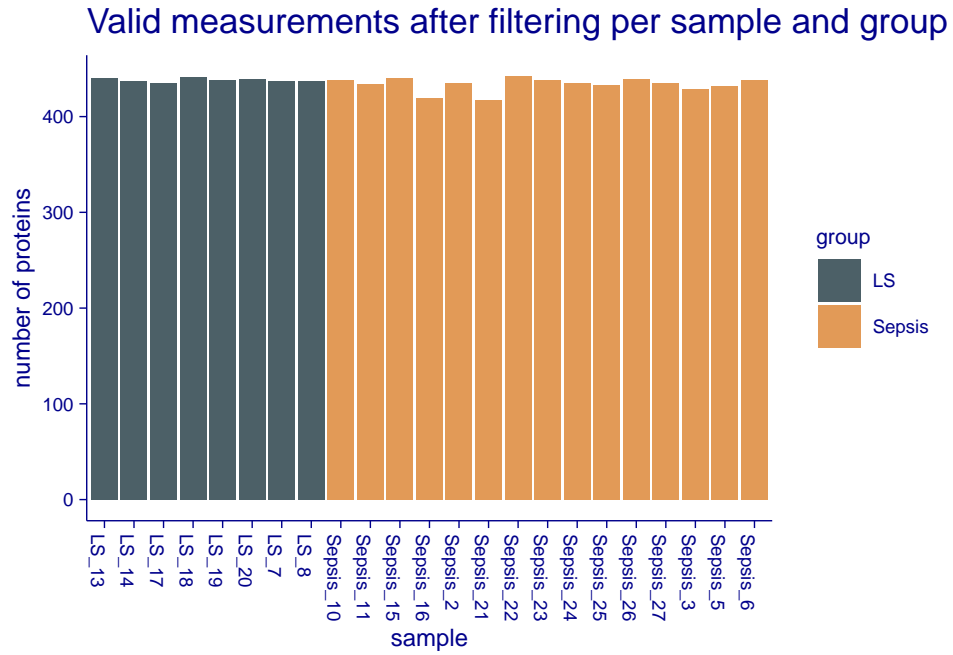

Figure 4: Valid measurements after filtering per sample and group

## Imputation

- NAs were imputed using single imputation, assuming MNAR
- For each sample, the sample mean and sample sd were determined
- Then imputations were performed, using a random draw from a Gaussian distribution
- The mean for imputations was downshifted with  $-1.8$  sample sd and the width  $0.3 * \text{sample sd}$

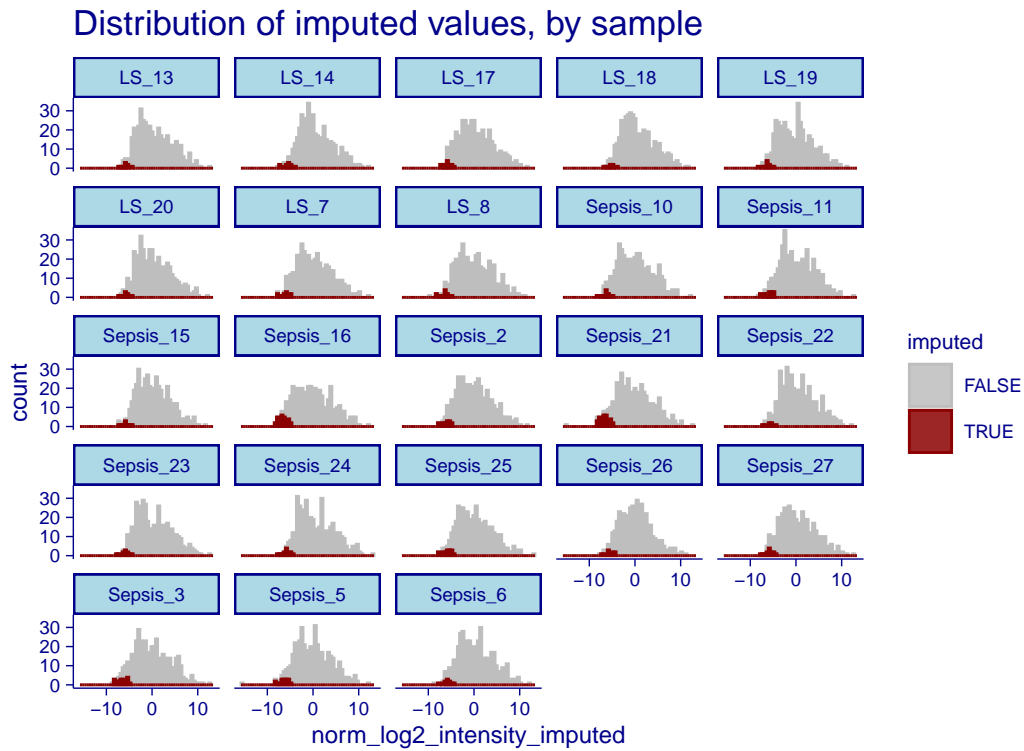

Figure 5: Distribution of imputed values.

## Differential expression

- 449 t-tests (students t-test) were performed, one-at-a-time for each protein, between LS and Sepsis groups
- Results are presented as:
  - $\text{Log2FC} = \text{mean}(\log(\text{LS})) - \text{mean}(\log(\text{Sepsis}))$
  - p values from t-test
  - q values using Benjamini-Hochberg corrections
  - $\text{FC}(\text{Fold change}) = 2^{\text{Log2FC}}$
  - Values with  $\text{Log2FC} \pm 1.0$  and q value  $< 0.05$  were considered significant

Table 1: Differential expression between LS and Sepsis.

| protein | log2FC    | pval    | qval   | FC   | sign |
|---------|-----------|---------|--------|------|------|
| P05362  | 2.435316  | 0.00007 | 0.0075 | 5.41 | +    |
| P01833  | 2.235880  | 0.00203 | 0.0380 | 4.71 | +    |
| Q8NBJ4  | 2.211931  | 0.00013 | 0.0096 | 4.63 | +    |
| P22897  | 2.193893  | 0.00046 | 0.0173 | 4.58 | +    |
| Q8WWZ8  | 1.960625  | 0.00065 | 0.0224 | 3.89 | +    |
| Q8N6C8  | 1.954227  | 0.00021 | 0.0105 | 3.88 | +    |
| P59665  | 1.865810  | 0.00076 | 0.0243 | 3.64 | +    |
| Q9Y6R7  | 1.803332  | 0.00002 | 0.0047 | 3.49 | +    |
| O43493  | 1.746654  | 0.00127 | 0.0304 | 3.36 | +    |
| P13987  | 1.732519  | 0.00018 | 0.0100 | 3.32 | +    |
| P13796  | 1.528998  | 0.00000 | 0.0013 | 2.89 | +    |
| P18065  | 1.462872  | 0.00107 | 0.0301 | 2.76 | +    |
| P01011  | 1.234761  | 0.00032 | 0.0145 | 2.35 | +    |
| P16070  | 1.215531  | 0.00007 | 0.0075 | 2.32 | +    |
| P08637  | 1.211105  | 0.00213 | 0.0382 | 2.32 | +    |
| P02763  | 1.198712  | 0.00039 | 0.0160 | 2.30 | +    |
| P19652  | 1.125478  | 0.00015 | 0.0096 | 2.18 | +    |
| P02649  | 1.010606  | 0.00085 | 0.0254 | 2.01 | +    |
| P02647  | -1.091806 | 0.00122 | 0.0304 | 0.47 | +    |
| P80108  | -1.759293 | 0.00012 | 0.0096 | 0.30 | +    |

## Volcano plot

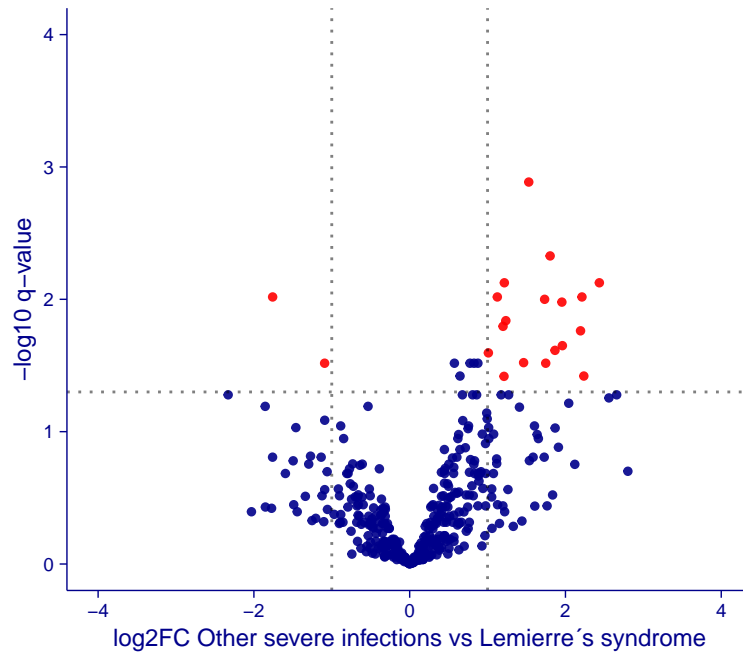

Figure 6: Volcano plot. Proteins that are differentially expressed between LS and Sepsis = red



## Heatmap

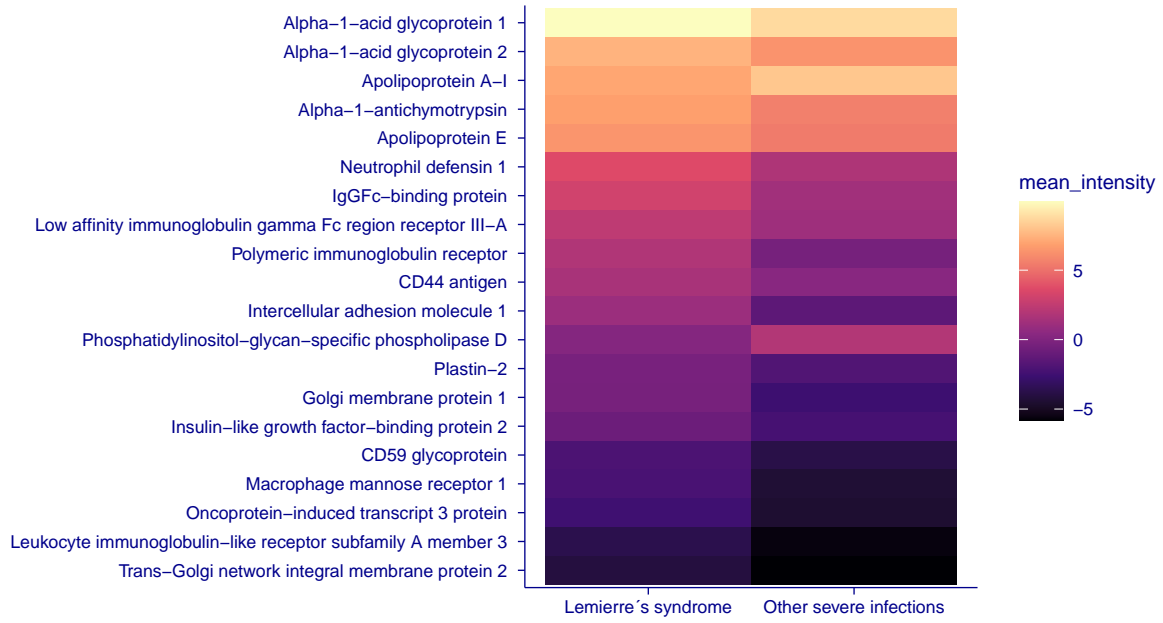

Figure 7: heatmap of differentially expressed proteins between LS and Other severe infections

Table 2: Table underlying the heatmap above. LS and Sepsis are mean normalized log2-transformed intensities

| protein_id | protein_name                                                | LS    | Sepsis |
|------------|-------------------------------------------------------------|-------|--------|
| P02763     | Alpha-1-acid glycoprotein 1                                 | 9.92  | 8.72   |
| P19652     | Alpha-1-acid glycoprotein 2                                 | 7.43  | 6.31   |
| P02647     | Apolipoprotein A-I                                          | 6.99  | 8.08   |
| P01011     | Alpha-1-antichymotrypsin                                    | 6.78  | 5.55   |
| P02649     | Apolipoprotein E                                            | 6.38  | 5.37   |
| P59665     | Neutrophil defensin 1                                       | 3.62  | 1.75   |
| Q9Y6R7     | IgGFc-binding protein                                       | 3.05  | 1.25   |
| P08637     | Low affinity immunoglobulin gamma Fc region receptor III-A  | 2.34  | 1.13   |
| P01833     | Polymeric immunoglobulin receptor                           | 1.82  | -0.42  |
| P16070     | CD44 antigen                                                | 1.52  | 0.31   |
| P05362     | Intercellular adhesion molecule 1                           | 1.02  | -1.42  |
| P80108     | Phosphatidylinositol-glycan-specific phospholipase D        | 0.14  | 1.90   |
| P13796     | Plastin-2                                                   | -0.36 | -1.89  |
| Q8NBJ4     | Golgi membrane protein 1                                    | -0.40 | -2.61  |
| P18065     | Insulin-like growth factor-binding protein 2                | -0.84 | -2.30  |
| P13987     | CD59 glycoprotein                                           | -2.07 | -3.80  |
| P22897     | Macrophage mannose receptor 1                               | -2.18 | -4.38  |
| Q8WWZ8     | Oncoprotein-induced transcript 3 protein                    | -2.54 | -4.50  |
| Q8N6C8     | Leukocyte immunoglobulin-like receptor subfamily A member 3 | -3.66 | -5.61  |
| O43493     | Trans-Golgi network integral membrane protein 2             | -4.06 | -5.81  |
